# Supplementary material for: Deciphering O -glycoprotease substrate preferences with O-Pair Search
Source: Royal Society of Chemistry journal article supplement (doi:10.1039/d2mo00244b), 2022-11-08
Supplement: d2mo00244b1.pdf [file d2mo00244b1.pdf]

Please use files  
tab to view ESI  
tables.
