# Supplementary material for: Deciphering O-glycoprotease substrate preferences with O-Pair Search†
Source: Mol Omics. Author manuscript; Available in PMC 2023 Mar 13. (PMC10010678; doi:10.1039/d2mo00244b)
Supplement: Supplemental info 3 [file NIHMS1878830-supplement-Supplemental_info_3.xlsx]

## Sheet: 12 glycan compositions
H1N1			N	HexNAc
H1N1A1			H	Hex
H1N1A2			A	NeuAc
H1N2			G	NeuGc
H1N2A1			F	Fucose
H2N2
H2N2A1
H2N2A1F1
H2N2A2
H2N2A2F1
N1
N1A1

## Sheet: 22 glycan compositions
H1N1			N	HexNAc
H1N1A1			H	Hex
H1N1A1G1			A	NeuAc
H1N1A2			G	NeuGc
H1N1G1			F	Fucose
H1N1G2
H1N2
H1N2A1
H1N2G1
H2N2
H2N2A1
H2N2A1F1
H2N2A1G1
H2N2A1G1F1
H2N2A2
H2N2A2F1
H2N2G1
H2N2G1F1
H2N2G2
H2N2G2F1
N1
N1A1

## Sheet: 47 glycan compositions
H1N1			N	HexNAc
H1N1A1			H	Hex
H1N1A1F1			A	NeuAc
H1N1A1G1			G	NeuGc
H1N1A1G2			F	Fucose
H1N1A2
H1N1A2G1
H1N1A3
H1N1F1
H1N1G1
H1N1G1F1
H1N1G2
H1N1G3
H1N2
H1N2A1
H1N2A1F1
H1N2A1G2
H1N2A2G1
H1N2A3
H1N2F1
H1N2G1
H1N2G1F1
H1N2G3
H2N1
H2N1A1
H2N1A1F1
H2N1A1G1
H2N1A2
H2N1F1
H2N1G1
H2N1G1F1
H2N1G2
H2N2
H2N2A1
H2N2A1F1
H2N2A1G1
H2N2A1G1F1
H2N2A2
H2N2A2F1
H2N2F1
H2N2G1
H2N2G1F1
H2N2G2
H2N2G2F1
N1
N1A1
N2
